# Supplementary material for: Microstructured silk fiber scaffolds with enhanced stretchability
Source: Royal Society of Chemistry journal article supplement (doi:10.1039/d4bm00624k), 2024-01-01
Supplement: d4bm00624k1.pdf [file d4bm00624k1.pdf]

## Supporting Information

### Microstructured silk-fiber scaffolds with enhanced stretchability

Martina Viola<sup>1,2</sup>, Gerardo Cedillo-Servin<sup>1,3</sup>, Anne Metje van Genderen<sup>4</sup>, Isabelle Imhof<sup>1</sup>, Paula Vena<sup>1,3,5</sup>, Marko Mihajlovic<sup>2</sup>, Susanna Piluso<sup>7</sup>, Jos Malda<sup>1,6</sup>, Tina Vermonden<sup>2</sup> and Miguel Castilho<sup>1,3,5\*</sup>

<sup>1</sup> Department of Orthopaedics, University Medical Centre Utrecht, Utrecht, the Netherlands.

<sup>2</sup> Division of Pharmaceutics, Department of Pharmaceutical Sciences (UIPS), Faculty of Science, Utrecht University, Utrecht, the Netherlands.

<sup>3</sup> Department of Biomedical Engineering, Eindhoven University of Technology, Eindhoven, the Netherlands

<sup>4</sup> Division of Pharmacology, Department of Pharmaceutical Sciences (UIPS), Faculty of Science, Utrecht University, Utrecht, the Netherlands.

<sup>5</sup> Institute for Complex Molecular Systems, Eindhoven University of Technology, Eindhoven, the Netherlands

<sup>6</sup> Department of Clinical Sciences, Faculty of Veterinary Sciences, Utrecht University, Utrecht, the Netherlands

<sup>7</sup> SentryX B.V., Utrecht, the Netherlands.

\*E-mail: [m.dias.castilho@tue.nl](mailto:m.dias.castilho@tue.nl)

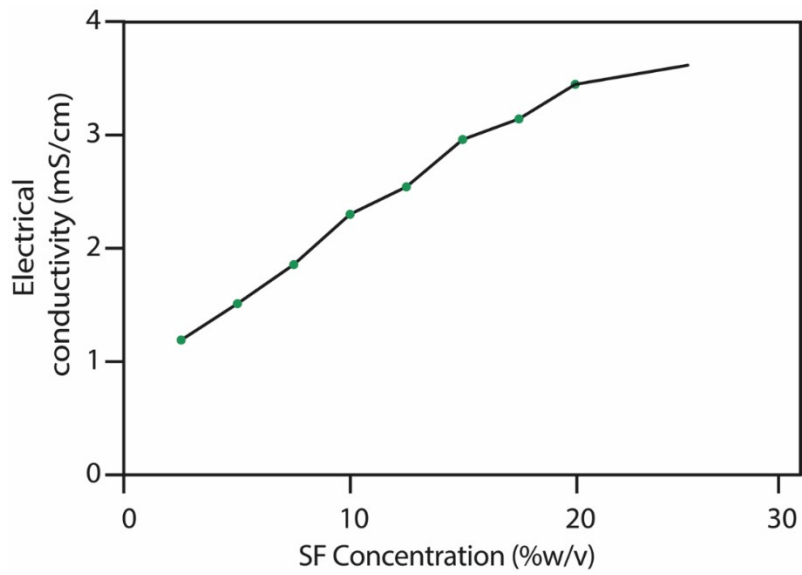

**Figure S1.** Electrical conductivity of SF5DT aqueous solutions at different concentrations.

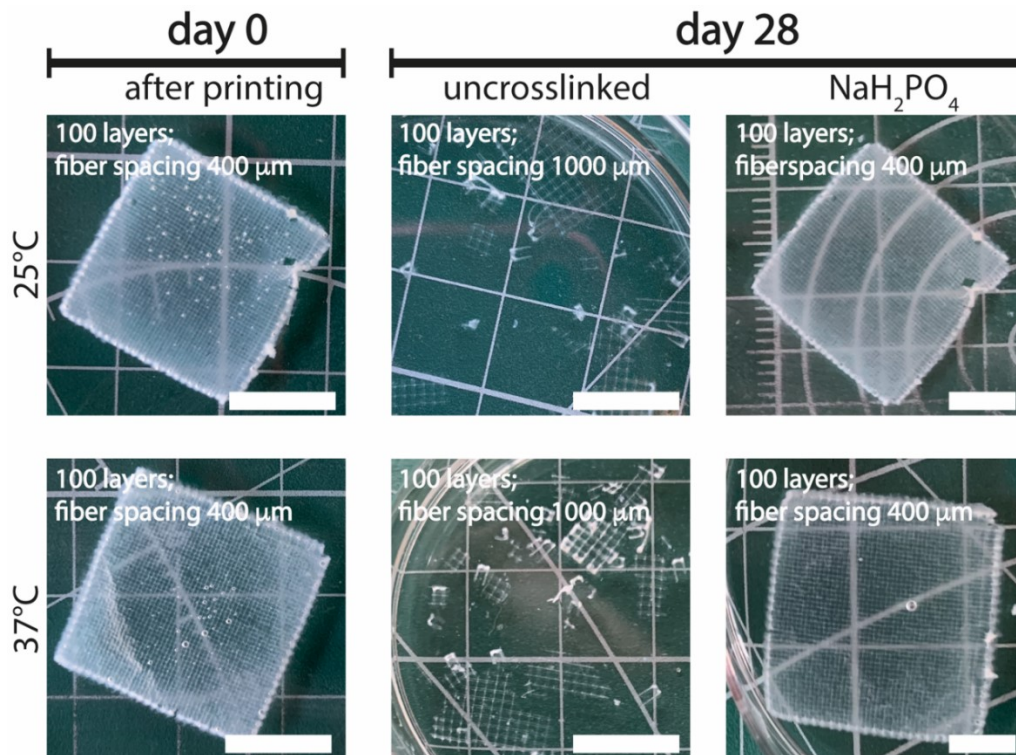

**Figure S2.** Stability of flat scaffolds at 25°C and 37°C in PBS over 28 days with and without NaH<sub>2</sub>PO<sub>4</sub> treatment; scale bars: 1 cm.

## Crosslinked with $\text{NaH}_2\text{PO}_4$      Crosslinked with Methanol

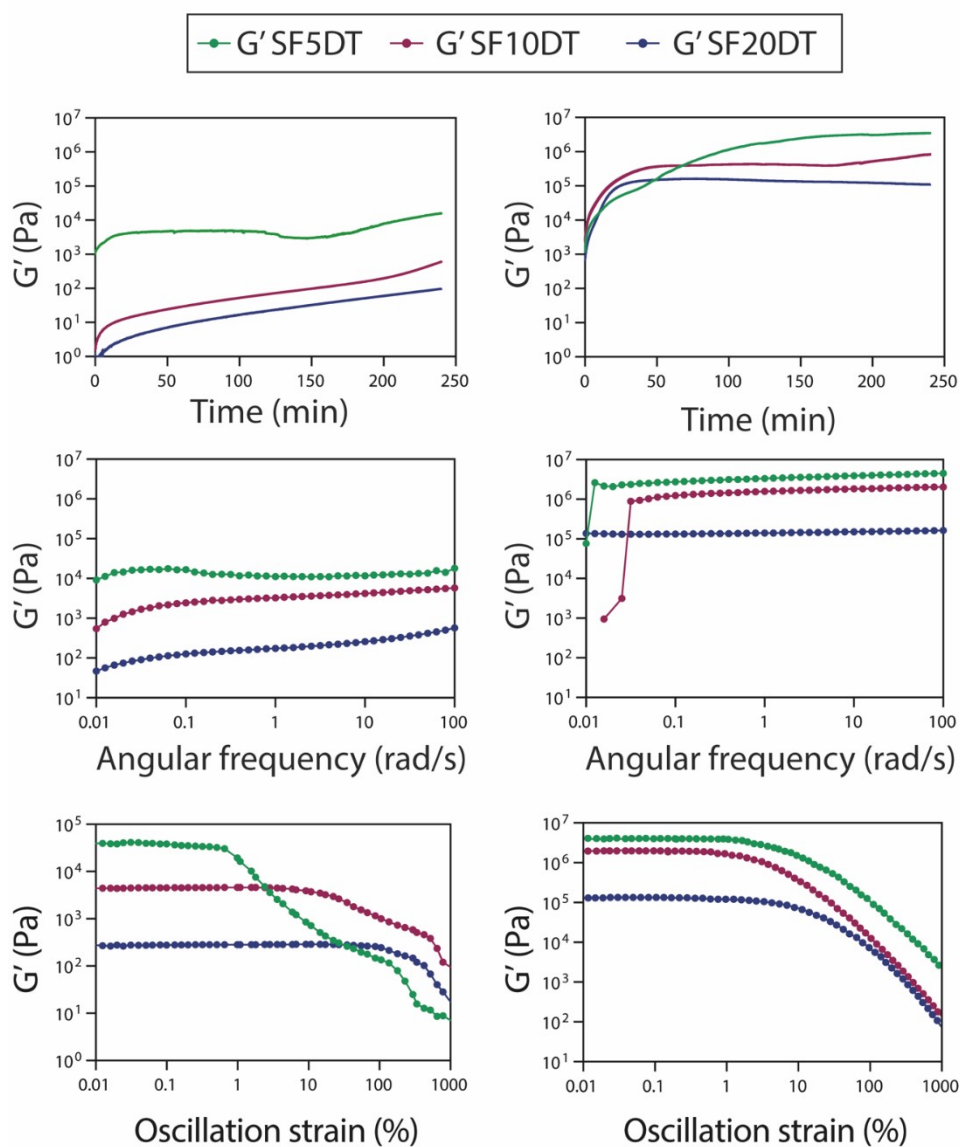

**Figure S3.** Rheological characterization of SF (at 20% w/v) with different degumming times, crosslinked with sodium dihydrogen phosphate ( $\text{NaH}_2\text{PO}_4$ ; left column) and methanol (MeOH; right column).

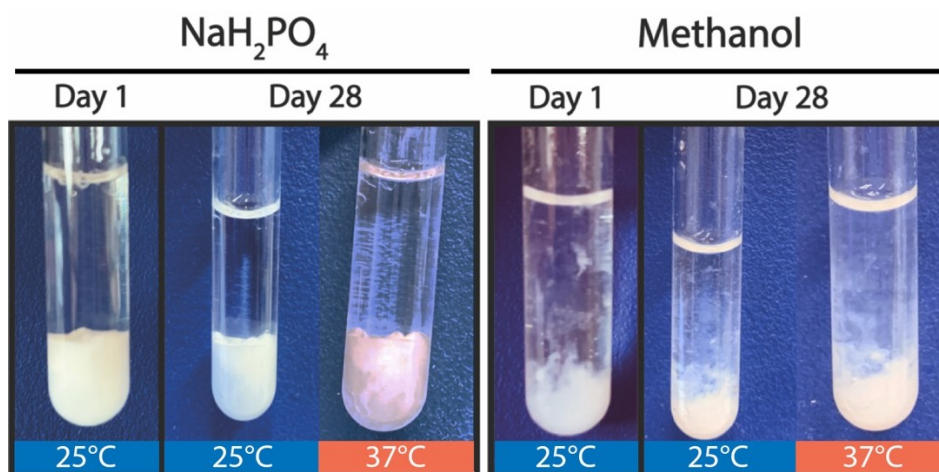

**Figure S4.** Stability of bulk SF gels treated with NaH<sub>2</sub>PO<sub>4</sub> or methanol over 28 days at 25°C and 37 °C.

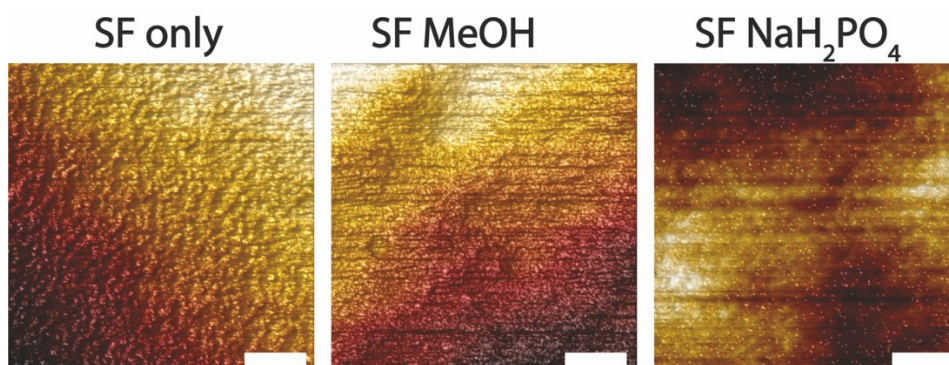

**Figure S5.** AFM 3D visualization of topography of single SF fibers before crosslinking (SF only) and after crosslinking (SF MeOH and SF NaH<sub>2</sub>PO<sub>4</sub>); scale bars: 200 nm.

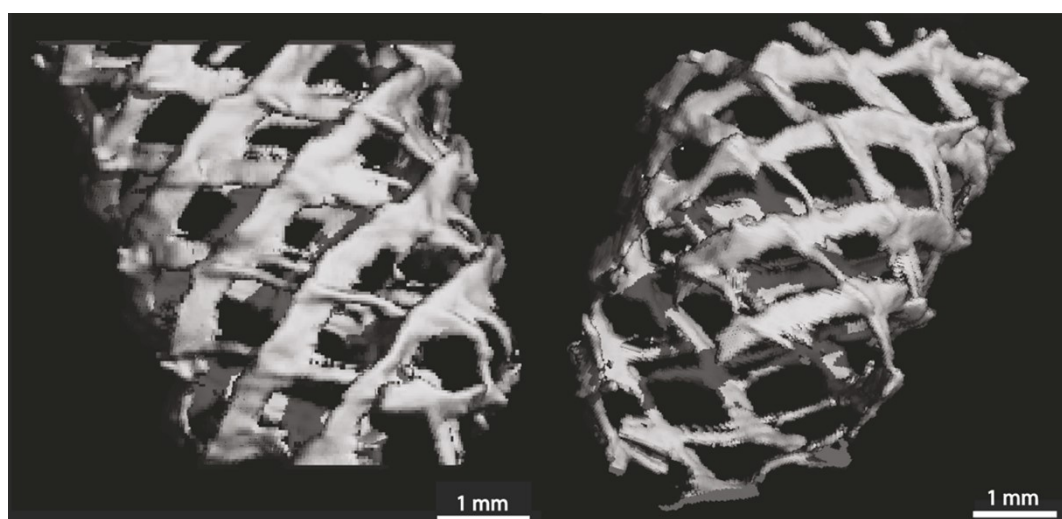

**Figure S6.** μCT scan reconstruction of a SF tubular scaffold with NaH<sub>2</sub>PO<sub>4</sub> post-processing treatment.

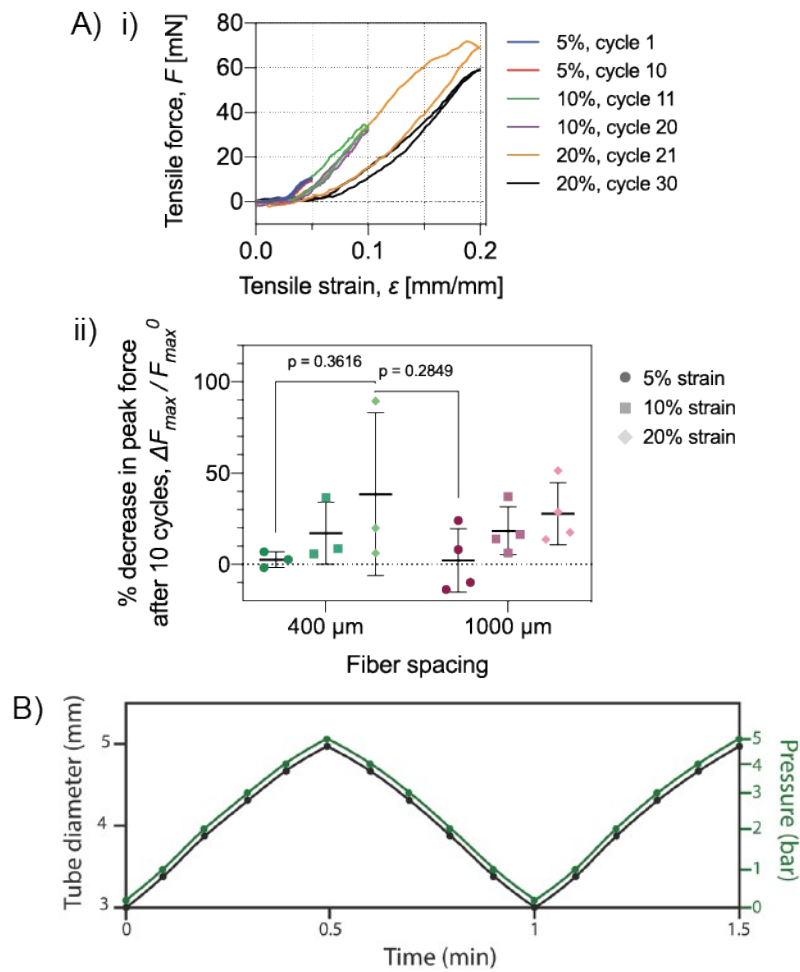

**Figure S7.** A) Cyclic tensile testing of flat scaffolds with inter-fiber spacing of 1000  $\mu\text{m}$ : i) Representative curves, and ii) decrease in maximum tensile force of scaffolds after 10 cycles with 5% maximum strain (cycles 1–10), followed by 10 cycles with 10% maximum strain (cycles 11–20), and 10 cycles with 20% maximum strain (cycles 21–30) ( $n = 3–5$ ; two-way ANOVA with Tukey’s multiple comparisons test). B) Variation of tubular scaffold diameter with the swelling and deswelling of a balloon catheter.

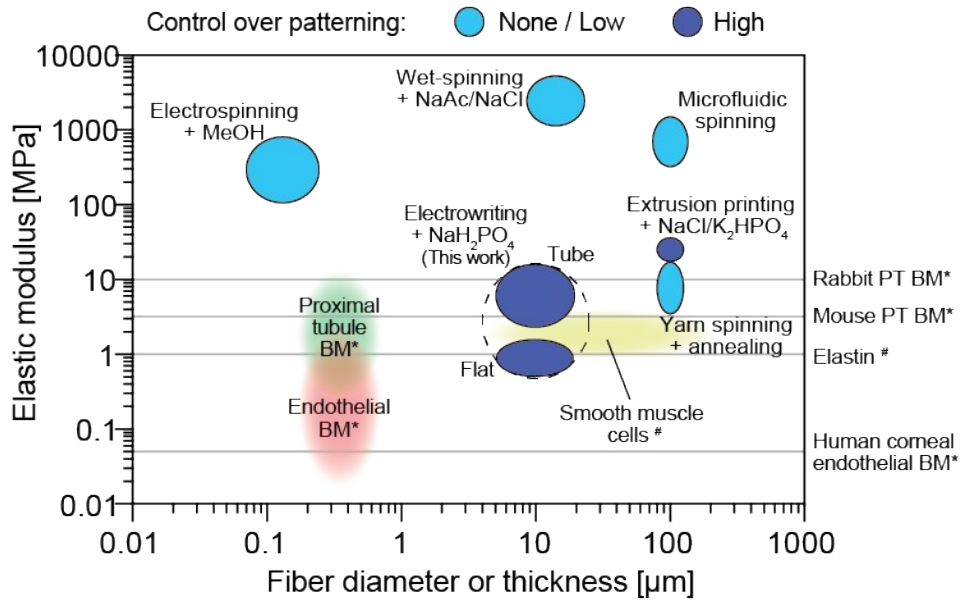

**Figure S8.** Comparison of SF elastic modulus, and fiber diameter, and patternability obtained through the methods listed in Table S1, with respect to the dimensions of cells or native features relevant in vascular and kidney tissue engineering. Electrowriting followed  $\text{NaH}_2\text{PO}_4$  post-processing provides elastic modulus values in the range of native vascular and kidney tissues, while coming closest to the native tissue scales. \*Sourced from van Genderen *et al.*<sup>43</sup> #Sourced from Camasão *et al.*<sup>55</sup> PT: kidney proximal tubule; BM: basement membrane; MeOH: methanol; NaAc: sodium acetate.

i. ciPTEC

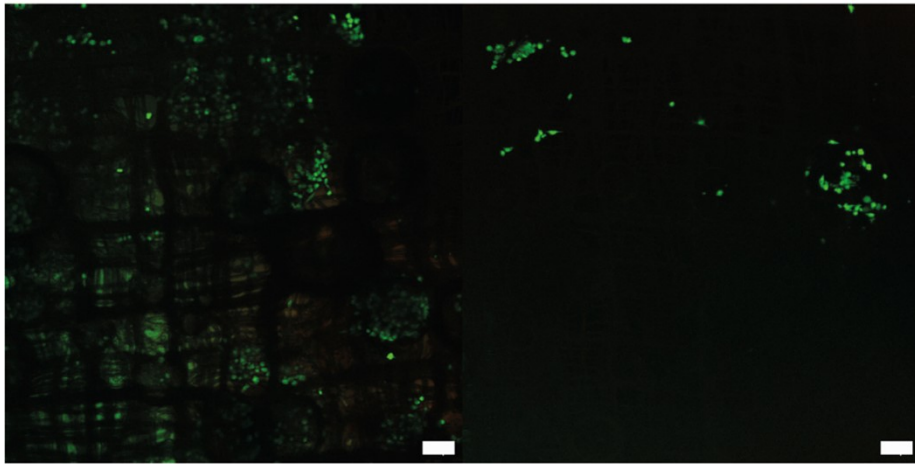

ii. ciGEnC

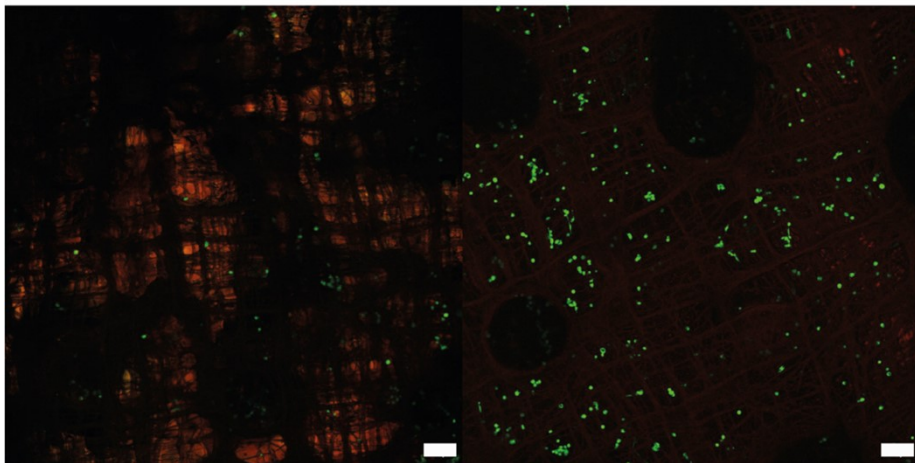

**Figure S9.** Human conditionally immortalized proximal tubular epithelial cells (ciPTEC) and glomerular endothelial cells (ciGEnC) cultured on non-coated flat scaffolds and stained for live (green) and dead (red) cells; scale bars: 100  $\mu$ m.

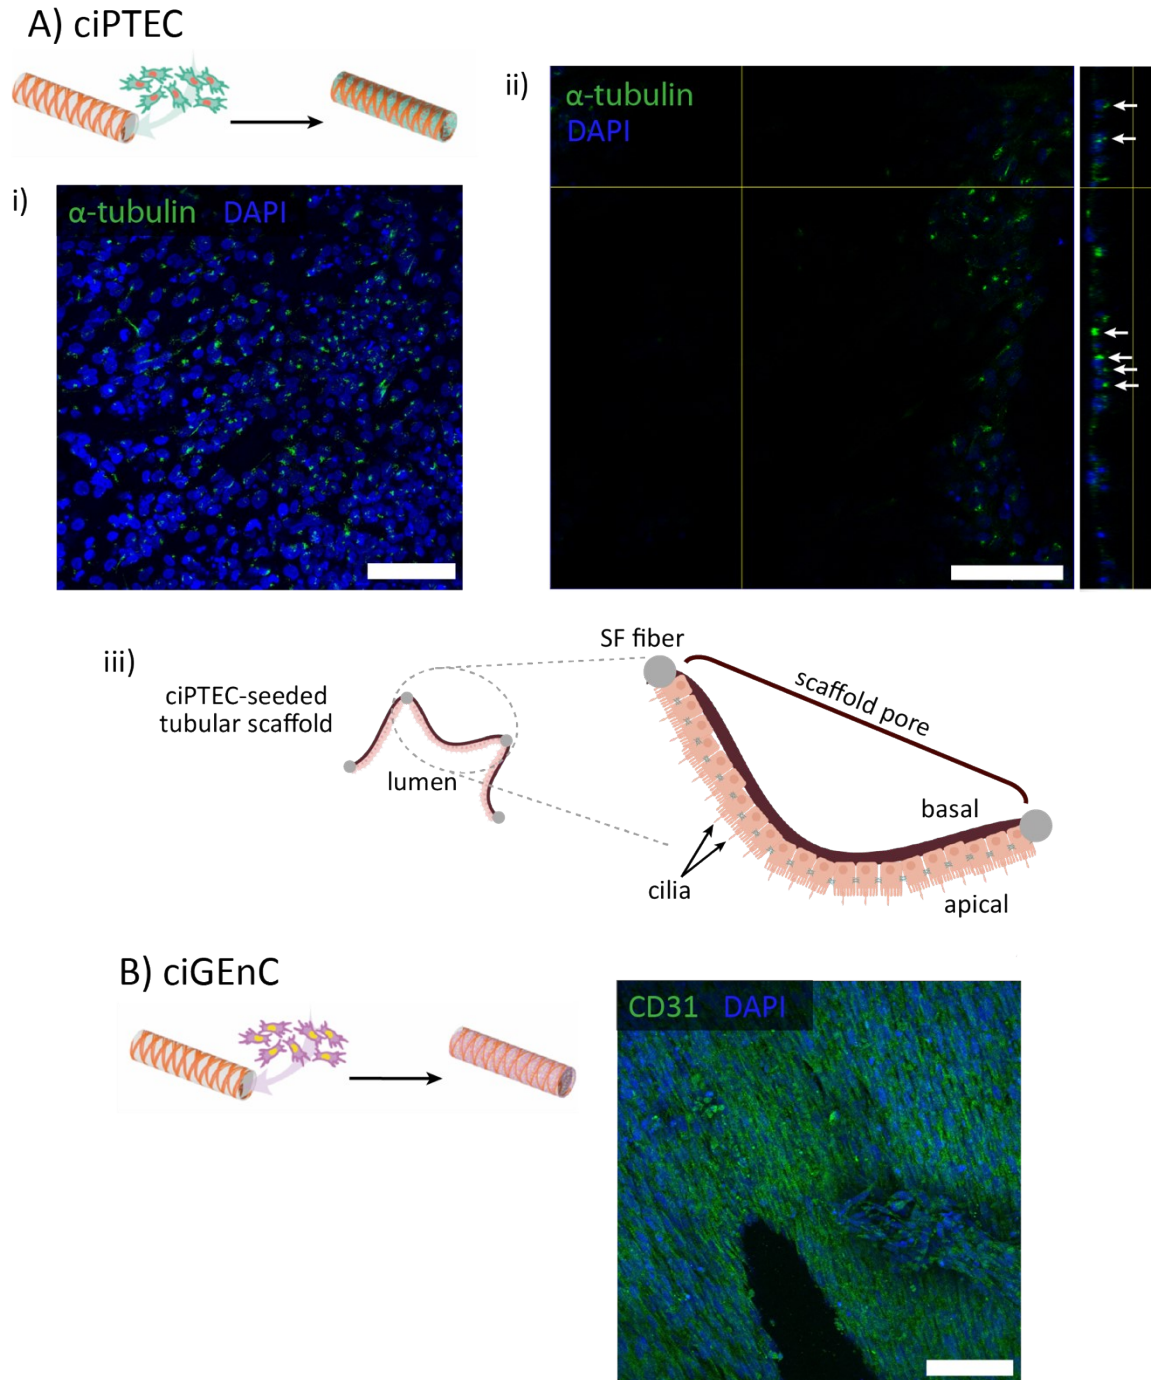

**Figure S10.** Tissue-specific staining of cell-seeded SF tubular scaffolds (60°, 100 layers). A) Human conditionally immortalized proximal tubular epithelial cells (ciPTEC) with expression of  $\alpha$ -tubulin (green), marker for primary cilia; nuclei in blue (DAPI): i) staining and ii) orthogonal section. White arrows indicate localization of  $\alpha$ -tubulin. iii) Graphical overview of polarized monolayer of epithelial cells within the pore of a tubular scaffold. B) Human conditionally immortalized glomerular endothelial cells (ciGEnC) with expression of CD31/PECAM1 (green); nuclei in blue (DAPI). Scale bars: 100  $\mu$ m.



**Table S1.** Notable examples of SF spinning and post-processing methods and their obtained patterning and mechanical properties.

| Spinning solution                       | Spinning method                               | Post-processing method                                                                                                     | Control over patterning                                                                  | Mechanical properties after post-processing                                                                                                                             | Ref. |
|-----------------------------------------|-----------------------------------------------|----------------------------------------------------------------------------------------------------------------------------|------------------------------------------------------------------------------------------|-------------------------------------------------------------------------------------------------------------------------------------------------------------------------|------|
| SF in HFIP                              | Wet-spinning                                  | Coagulation in MeOH                                                                                                        | No patterning. Fibers only (20–100 $\mu\text{m}$ )                                       | Tensile strength = 50–200 MPa                                                                                                                                           | 15   |
| SF in HFA-hydrate                       | Wet-spinning                                  | Coagulation in MeOH, steam annealing                                                                                       | No patterning. Fiber only                                                                | Young's modulus = 54 cN/dtex (compared to 61 cN/dtex of native silk fiber)                                                                                              | 16   |
| SF in formic acid                       | Casting                                       | MeOH treatment                                                                                                             | No patterning.                                                                           | NS                                                                                                                                                                      | 17   |
| SF in water or HFIP                     | Casting                                       | NaCl addition; MeOH treatment                                                                                              | No patterning. Tunable pore size. Porosity = 85–97%.                                     | Compressive modulus = 70–3330 kPa. Compressive stress = 11–320 kPa.                                                                                                     | 19   |
| Aqueous SF                              | Casting                                       | Treatment with $\text{Mg}^{2+}$ , $\text{Cu}^{2+}$ , $\text{Zn}^{2+}$ , $\text{K}^+$ , $\text{Na}^+$ , or $\text{Ca}^{2+}$ | No patterning.                                                                           | NS                                                                                                                                                                      | 20   |
| SF in formic acid                       | Electro-spinning                              | MeOH or EtOH treatment                                                                                                     | No patterning. Nanofibers (diameter = 80–210 nm) with random alignment                   | Elastic modulus = 140–610 MPa. Breaking strain = 8–19%.                                                                                                                 | 12   |
| Raw non-degummed silk yarn              | Yarn spinning                                 | PEG coating, annealing                                                                                                     | No patterning. Yarn fibers (100 $\mu\text{m}$ diameter).                                 | Tensile strength = 250–540 MPa. Young's modulus = 5–13 GPa.                                                                                                             | 56   |
| Aqueous SF                              | Casting with dityrosine photo-crosslinking    | MeOH treatment                                                                                                             | No patterning.                                                                           | Compressive modulus = 1.5 MPa (at 20% strain) and 11 MPa (at 40% strain)                                                                                                | 57   |
| Aqueous SF/PVA                          | Casting                                       | Horseradish peroxidase crosslinking                                                                                        | No patterning. Tunable pore size (= 32–68%) and porosity (77–90%).                       | Compressive modulus = 0.6–3 kPa.                                                                                                                                        | 25   |
| Aqueous SF                              | Extrusion 3D printing                         | Treatment in aqueous NaCl and $\text{K}_2\text{HPO}_4$                                                                     | High patternability. Medium porosity. Printed filaments (diameter = 100 $\mu\text{m}$ ). | Young's modulus = 25 MPa. Ultimate tensile toughness = 40 $\text{MJ}^3/\text{m}^3$ .                                                                                    | 39   |
| Aqueous SF/tyramine-modified hyaluronan | Casting                                       | Horseradish peroxidase crosslinking, sonication, long-time incubation                                                      | No patterning. Tunable porosity.                                                         | Highly time dependent properties. Compressive modulus = 300–700 kPa (day 0) and 10–1000 kPa (day 5). Stress at fracture = 100–200 kPa (day 0) and 150–1000 kPa (day 5). | 24   |
| Aqueous SF                              | Wet-spinning                                  | Coagulation in aqueous NaAc/NaCl                                                                                           | No patterning. Microfiber (diameter 10–20 $\mu\text{m}$ )                                | Young's modulus = 1.5–4 GPa. Toughness = 2–40 $\text{MJ}^3/\text{m}^3$ .                                                                                                | 58   |
| Methacrylated SF                        | Digital light processing with UV crosslinking | None                                                                                                                       | High patternability.                                                                     | Bending properties higher than native cartilage. No modulus specified. Stability over 14 days in medium.                                                                | 59   |
| Pre-                                    | Microfluidic                                  | None                                                                                                                       | No patterning.                                                                           | Elastic modulus* =                                                                                                                                                      | 60   |

|                                        |                |                                                |                                                                                                                                                                 |                                                                     |           |
|----------------------------------------|----------------|------------------------------------------------|-----------------------------------------------------------------------------------------------------------------------------------------------------------------|---------------------------------------------------------------------|-----------|
| assembled SF nanofibers in formic acid | spinning       |                                                | Microfibers (diameter = 100 $\mu\text{m}$ ) with hierarchical surface nanotopography.                                                                           | 350–1200 MPa. Tensile strength = 12–46 MPa.                         |           |
| Aqueous SF                             | Electrowriting | None                                           | High patternability. High porosity. Printed microfibers (diameter = 7–13 $\mu\text{m}$ )                                                                        | NS.<br>No stability reported.                                       | 21        |
| Aqueous SF                             | Electrowriting | Treatment in aqueous $\text{NaH}_2\text{PO}_4$ | High patternability. High porosity (>95%). Printed microfibers (diameter = 5–20 $\mu\text{m}$ ). Directional striations resembling self-assembled silk fibrils. | Elastic modulus = 0.7 – 12 MPa. High stability in PBS over 28 days. | This work |

SF: silk fibroin, NS: not specified, PBS: phosphate buffered saline solution, PEG: polyethylene glycol, HFIP: hexafluoroisopropanol, HF: hexafluoroacetone, MeOH: methanol, EtOH: ethanol, PVA: polyvinyl alcohol, UV: ultraviolet light, NaAc: sodium acetate. \*Estimated from stress-strain curves.

**Table S2.** List of antibodies used for immunocytochemistry.

| Primary antibody                                                               | Secondary antibody                                                                             |
|--------------------------------------------------------------------------------|------------------------------------------------------------------------------------------------|
| Live/Dead™ viability/cytotoxicity kit (L3224, Invitrogen)                      | NA                                                                                             |
| AlexaFluor 488 phalloidin (A22283, ThermoFisher Scientific) 1:1000 dilution    | NA                                                                                             |
| Rabbit polyclonal anti-collagen I (Ab34710, Abcam) 1:100 dilution              | AlexaFluor 488 donkey anti-rabbit (Invitrogen) 1:200 dilution                                  |
| Goat monoclonal anti-collagen IV (1340-01, Southern Biotech) 1:50 dilution     | AlexaFluor 568 donkey anti-goat or AlexaFluor 546 donkey anti-goat (Invitrogen) 1:200 dilution |
| Mouse monoclonal anti- $\alpha$ -tubulin (T6793, Sigma Aldrich) 1:200 dilution | AlexaFluor 488 donkey anti-mouse (Invitrogen) 1:200 dilution                                   |
| Mouse anti-CD31/PECAM1 (BBA7, R&D Systems) 1:150 dilution                      | AlexaFluor 488 donkey anti-mouse (Invitrogen) 1:200 dilution                                   |
| DAPI (D9542, Sigma Aldrich) 1:1000 dilution                                    | NA                                                                                             |

NA: not applicable.
